# Supplementary material for: Sodium to cesium ions: a general ladder mechanism of ion diffusion in prussian blue analogs
Source: Royal Society of Chemistry journal article supplement (doi:10.1039/d2cp01156e), 2022-01-01
Supplement: d2cp01156e1.pdf [file d2cp01156e1.pdf]

SUPPORTING MATERIALS FOR

# Sodium To Cesium Ions: A General Ladder Mechanism of Ion Diffusion in Prussian Blue Analogs

Johan Nordstrand <sup>\*1</sup>, Esteban Toledo-Carrillo <sup>1</sup>, Lars Kloo <sup>2</sup>, Joydeep Dutta <sup>1</sup>

<sup>1</sup> Functional Materials, Applied Physics Department, School of Engineering Sciences, KTH Royal Institute of Technology, AlbaNova universitetscentrum 106 91 Stockholm, Sweden

<sup>2</sup> Applied Physical Chemistry, Department of Chemistry, KTH Royal Institute of Technology, SE-100 44 Stockholm, Sweden

\*Corresponding author. Email: johanno3@kth.se

## Supplementary Section 1: Characterization Data

The scanning microscope images are presented in Figure 1. CuPB particles deposited on the surface of graphite foil present a dominant cubic morphology with a particle size ranging from 20 to 200 nm.

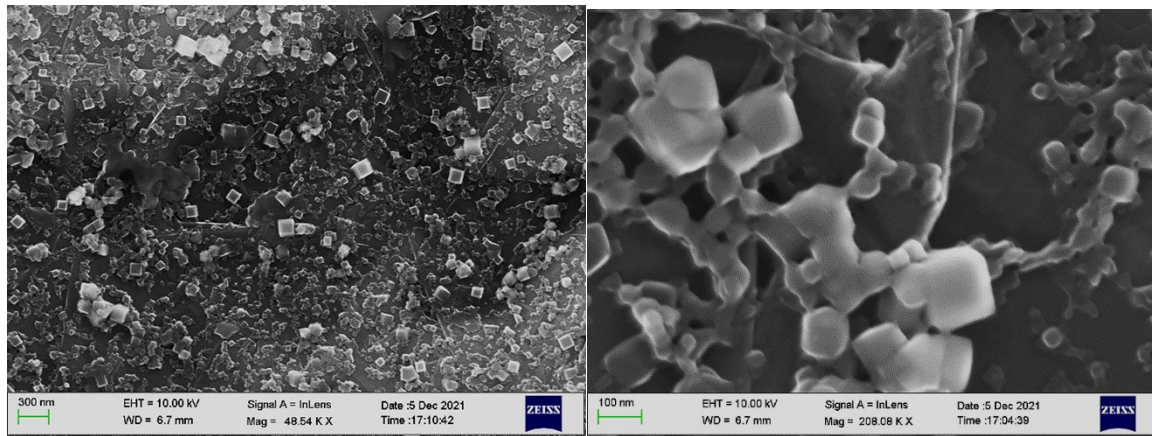

*Figure 1. Scanning microscope images for the CuPB*

Figure 2 shows the FTIR spectra of CuPB. It confirms the formation of CuPB particles on graphite foil. The characteristic band of Prussian Blue and its analog is present at 2081 and 2091  $\text{cm}^{-1}$ , associated to the stretching vibration of CN bonded to the two different transition metals in the structure (Fe and Cu). Two bands arise at 3360 and 1620  $\text{cm}^{-1}$  ascribed to the stretching and bending vibration of O-H groups due to the presence of interstitial water.<sup>1</sup>

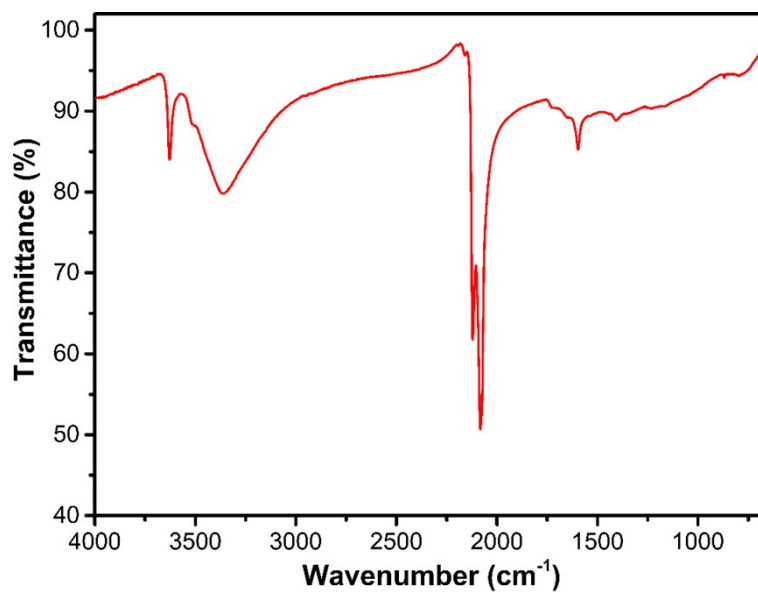

Figure 2. FTIR spectrum of CuPB.

Figure 3 shows the cyclic voltammogram of CuPb at different scan rates. It is important to notice that the intercalation process is governed by the redox transition of  $\text{Cu}^{2+}/\text{Cu}^+$ , whereas the transition  $\text{Fe}^{3+}/\text{Fe}^{2+}$  is inactive. It also shows the good reversibility of the redox couple  $\text{Cu}^{2+}/\text{Cu}^+$ , with a potential difference between the anodic and the cathodic reaction of 45 mV, which is related to the relatively short diffusion path, due to the size of the particles deposited.

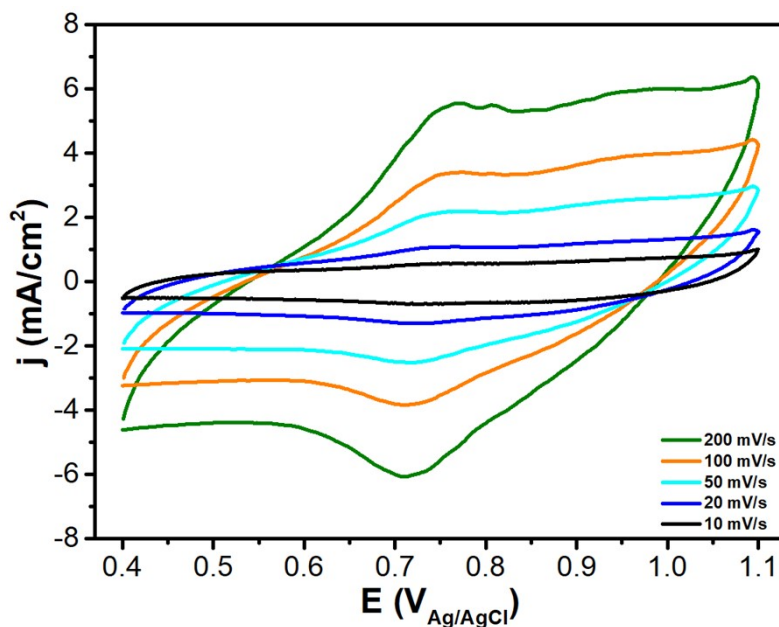

Figure 3. Cyclic voltammogram of CuPB.

## Supplementary References

- (1) Zhao, Y.; Liang, B.; Wei, X.; Li, K.; Lv, C.; Zhao, Y. A Core-Shell Heterostructured CuFe@NiFe Prussian Blue Analogue as a Novel Electrode Material for High-Capacity and Stable Capacitive Deionization. *J. Mater. Chem. A* **2019**, *7* (17), 10464–10474. <https://doi.org/10.1039/c8ta12433g>.
